# Supplementary material
Source: PubMed Central journal article supplement (PMC5331199)

### Fig1A

FUNDC1

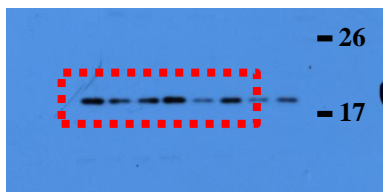

Tim23

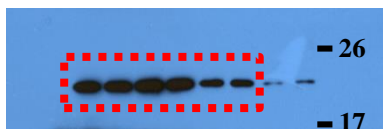

Tom20

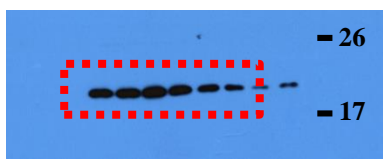

p62

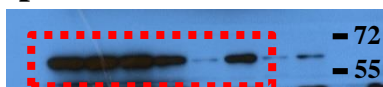

Actin

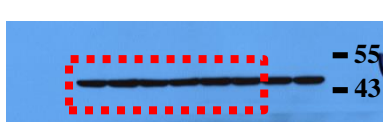

### Fig1C

FUNDC1

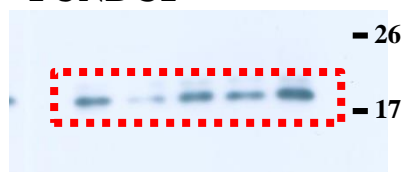

Actin

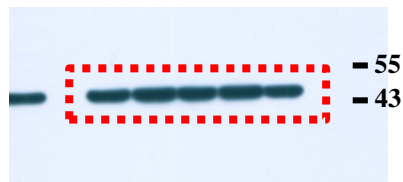

### Fig1F

HA (IP)

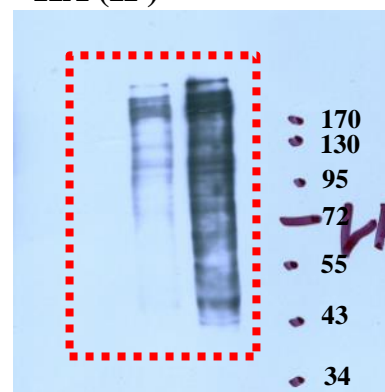

FUNDC1 (IP)

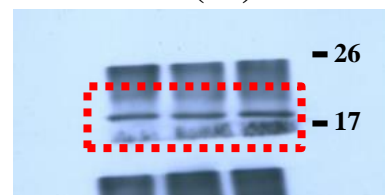

HA (Input)

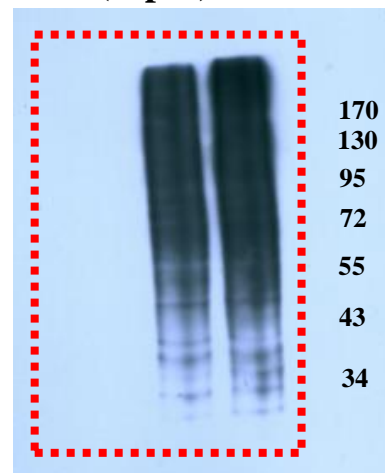

FUNDC1 (Input)

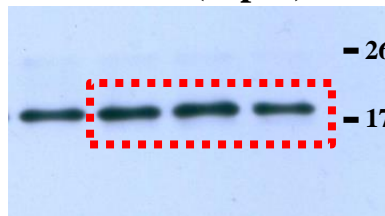

### Fig1D

FUNDC1

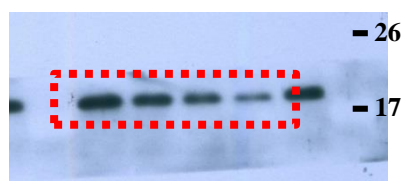

p-Tyr18

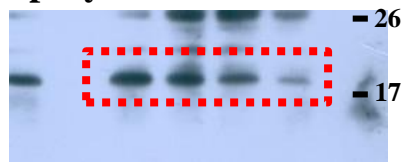

Actin

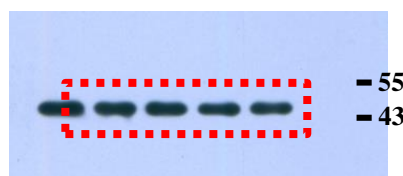

## Fig1G

HA (IP)

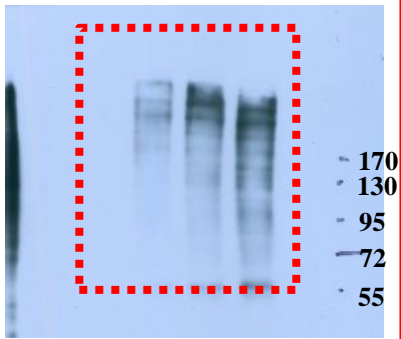

FUNDC1 (IP)

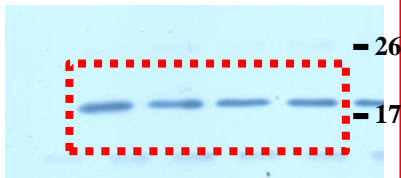

HA (Input)

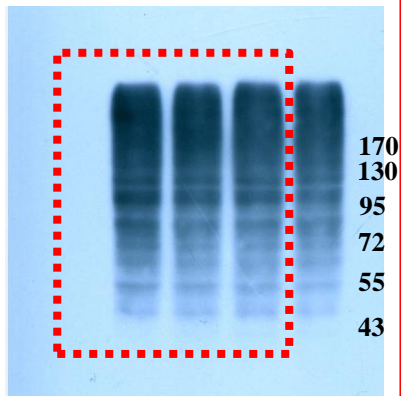

FUNDC1 (Input)

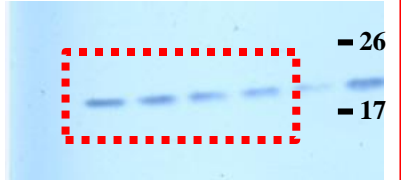

## Fig1I

HA (IP)

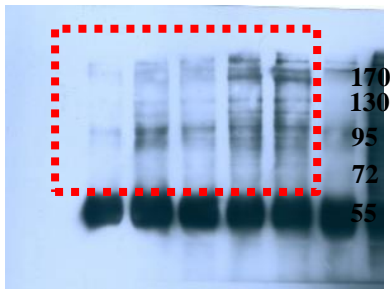

FUNDC1 (IP)

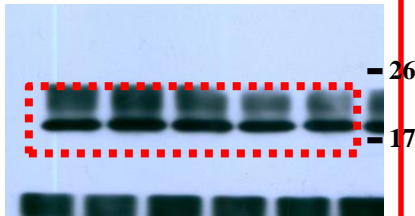

HA (Input)

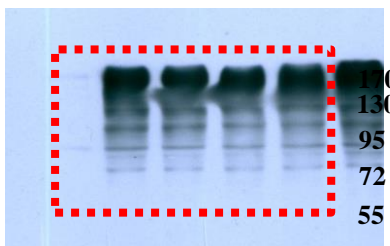

myc (Input)

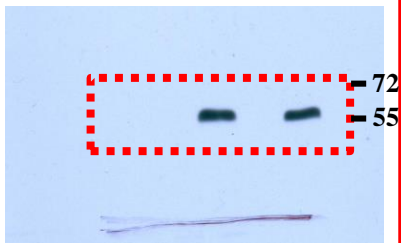

FUNDC1 (Input)

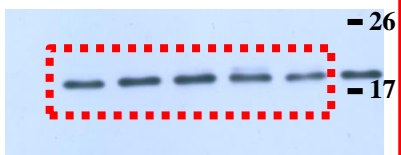

## Fig1J

FUNDC1

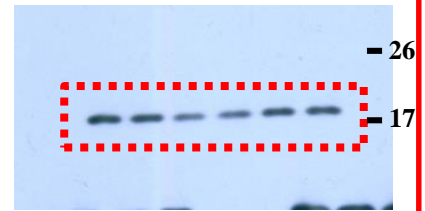

Tom20

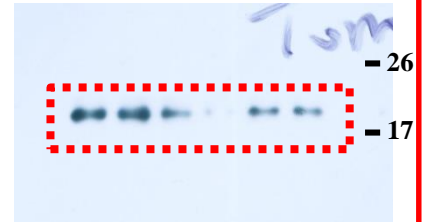

myc

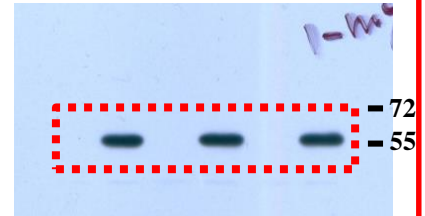

Actin

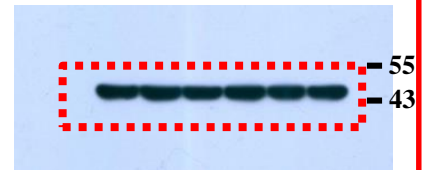

Supplement: EMBR-18-495-s003.pdf [file EMBR-18-495-s003.pdf]
