# Supplementary material
Source: PubMed Central journal article supplement (PMC5331199)

### Fig2A

HA (IP)

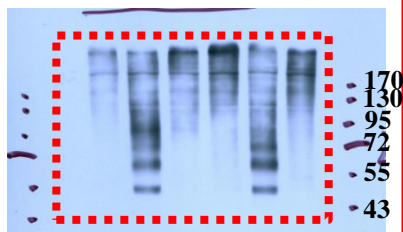

FUNDC1 (IP)

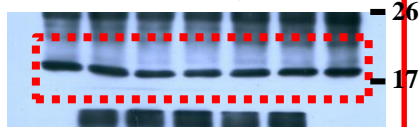

HA (Input)

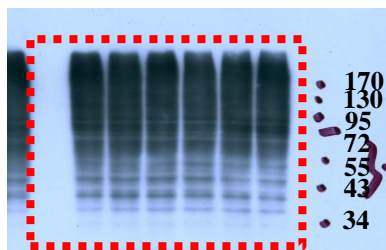

FUNDC1 (Input)

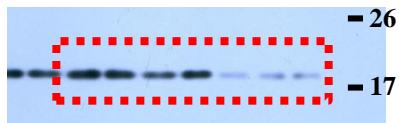

myc (Input)

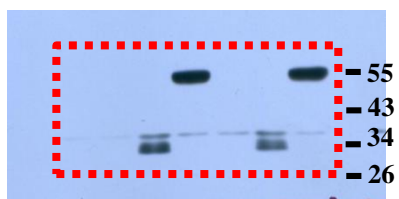

### Fig2B

HA (IP)

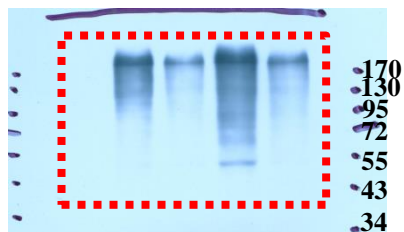

FUNDC1 (IP)

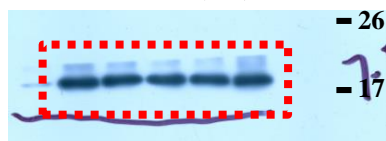

HA (Input)

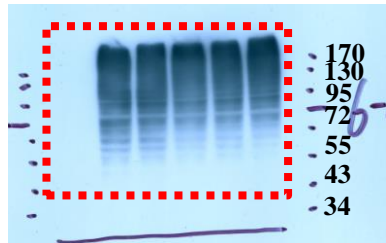

FUNDC1 (Input)

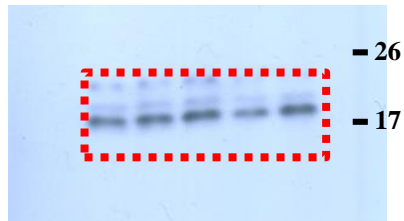

MARCH5 (Input)

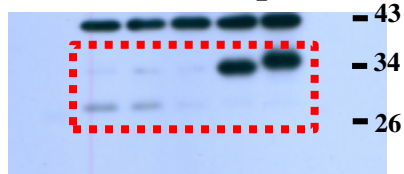

Actin

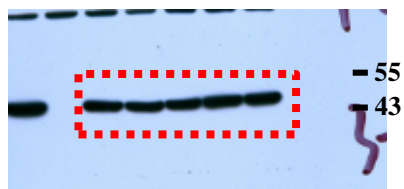

### Fig2C

ubiquitin

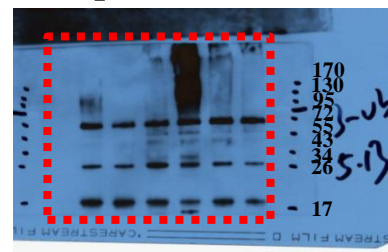

myc

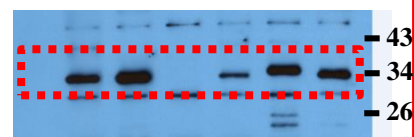

## Fig2D

FUNDC1

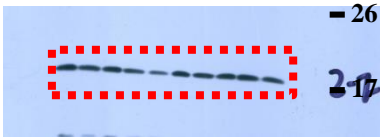

MiD49

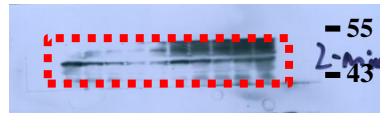

Actin

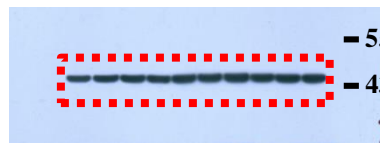

## Fig2F

FUNDC1

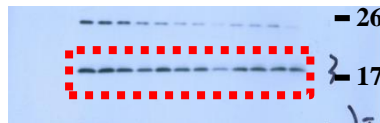

MiD49

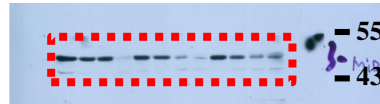

myc

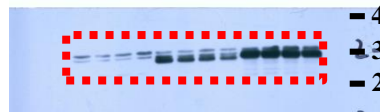

Actin

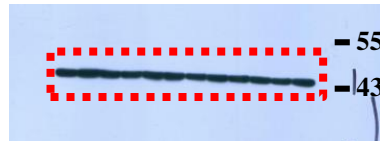

## Fig2H

FUNDC1

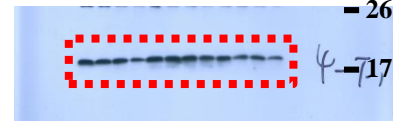

MiD49

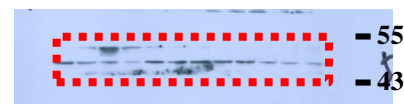

myc

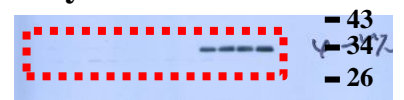

MARCH5

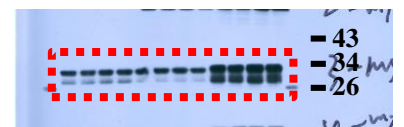

Actin

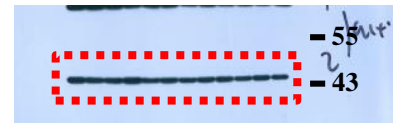

Supplement: EMBR-18-495-s004.pdf [file EMBR-18-495-s004.pdf]
