# Supplementary material
Source: PubMed Central journal article supplement (PMC5331199)

**Fig3A**

**myc**

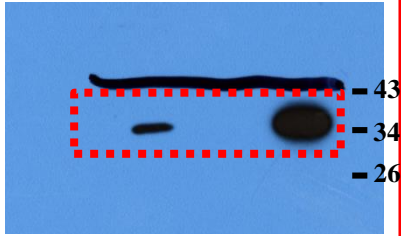

**FUNDC1**

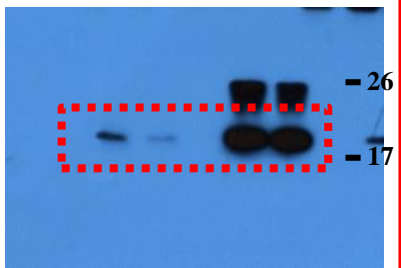

**Actin**

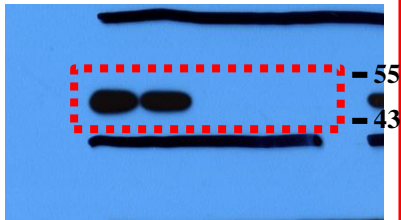

**Fig3B**

**MARCH5**

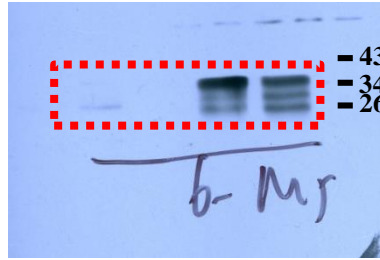

**FUNDC1**

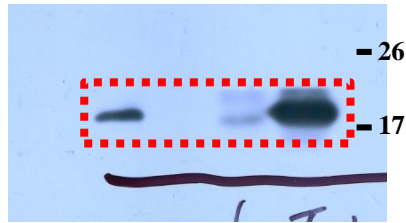

**Fig3C**

**FUNDC1 (pull down)**

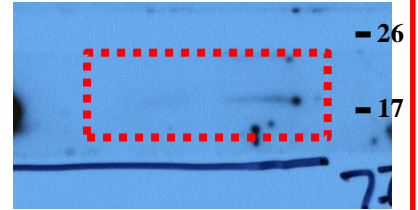

**FUNDC1 (Input)**

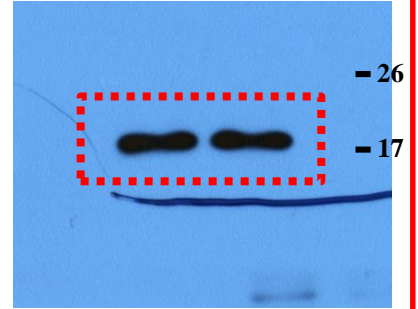

**GST**

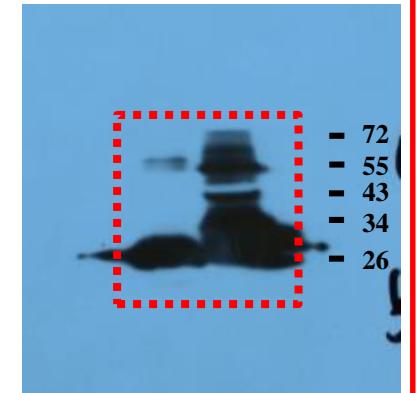

### Fig3D

myc (IP:FUNDC1)

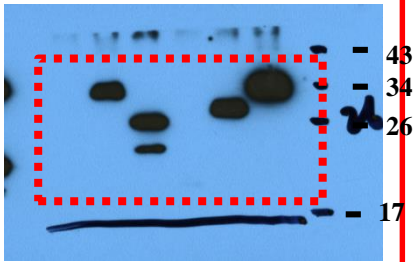

FUNDC1(IP:FUNDC1)

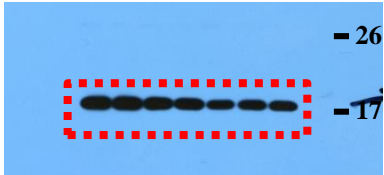

myc(Input)

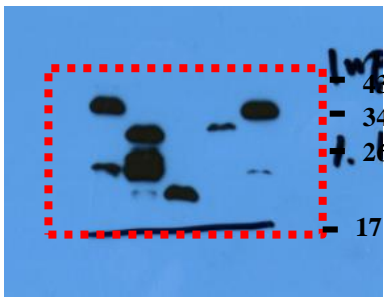

FUNDC1(Input)

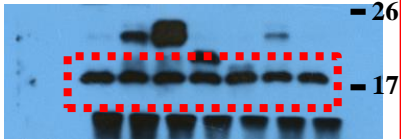

### Fig3E

myc (IP:GFP)

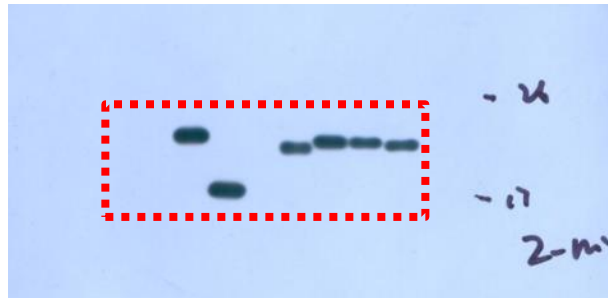

GFP(IP:GFP)

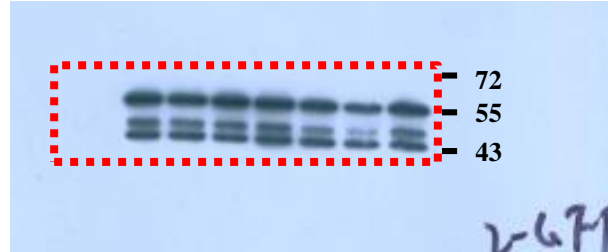

myc(Input)

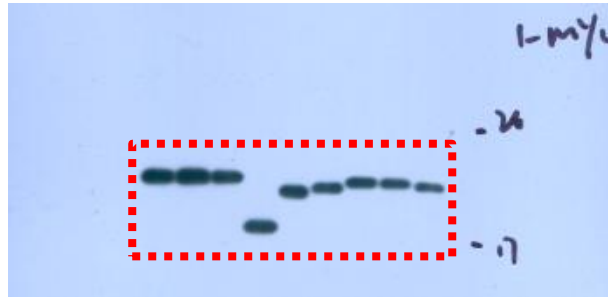

GFP(Input)

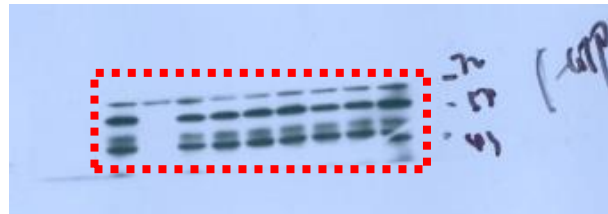

Supplement: EMBR-18-495-s005.pdf [file EMBR-18-495-s005.pdf]
