# Supplementary material
Source: PubMed Central journal article supplement (PMC5331199)

### Fig4B

HA (IP:FUNDC1)

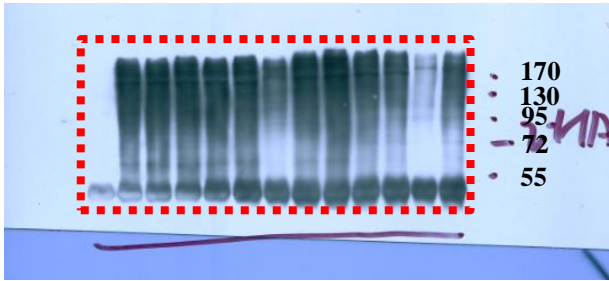

myc(IP:FUNDC1)

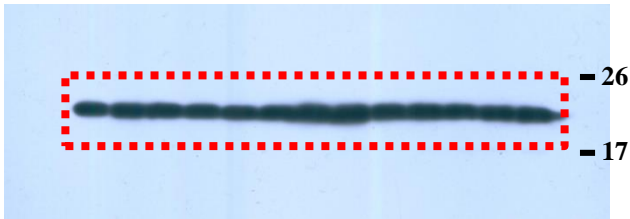

HA(Input)

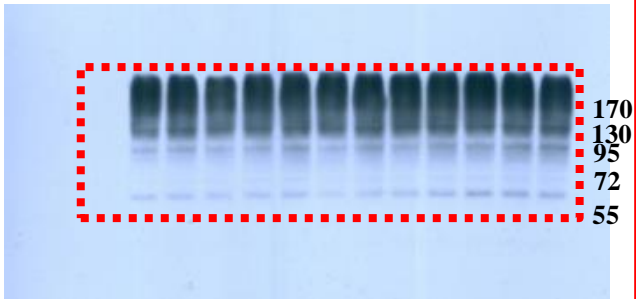

myc(Input)

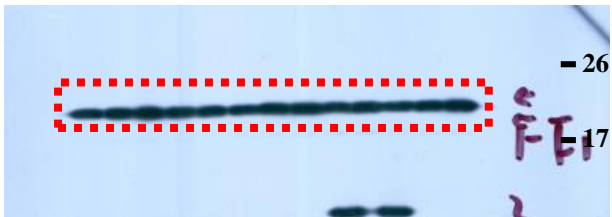

### Fig4C

ubiquitin

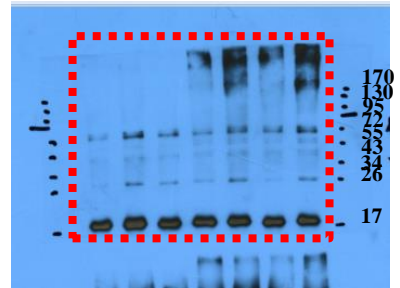

myc

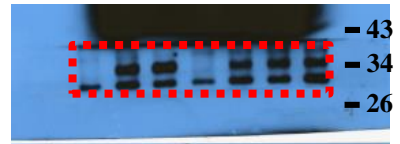

### Fig4D

myc

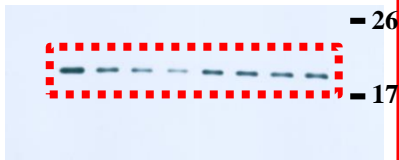

Actin

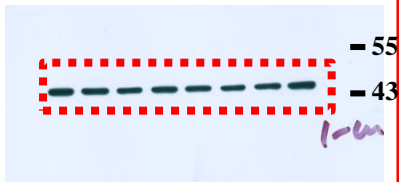

### Fig4F

myc

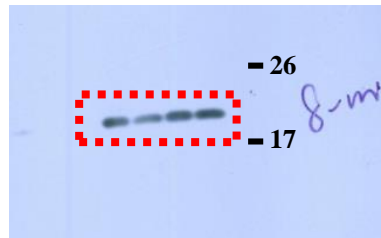

flag

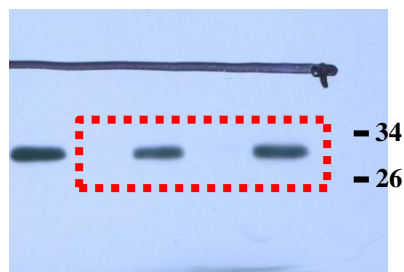

Actin

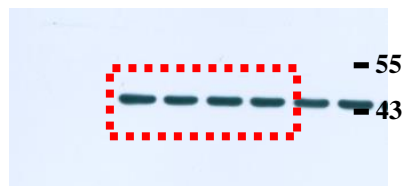

### Fig4H

Tim23

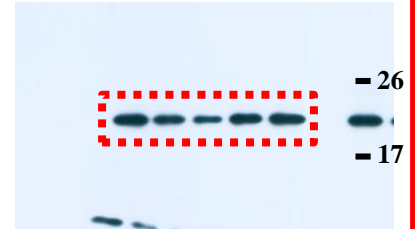

Tom20

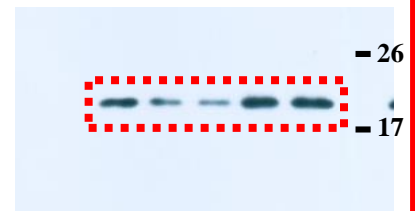

LC3

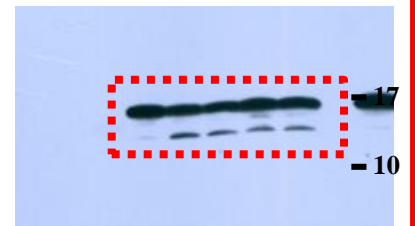

myc

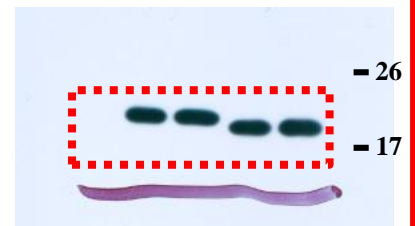

Actin

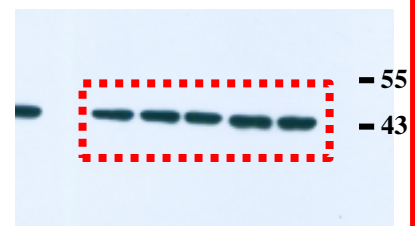

### Fig4E

myc

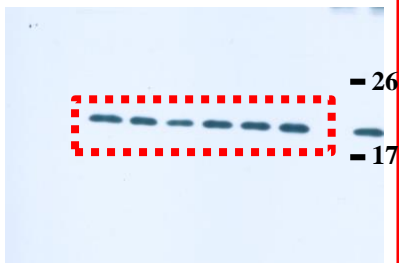

Actin

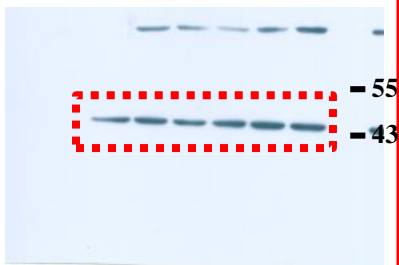

Supplement: EMBR-18-495-s006.pdf [file EMBR-18-495-s006.pdf]
