# Supplementary material
Source: PubMed Central journal article supplement (PMC5331199)

### Fig6A

myc(IP:FUNDC1)

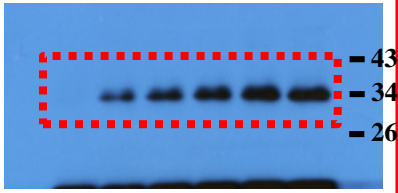

FUNDC1(IP:FUNDC1)

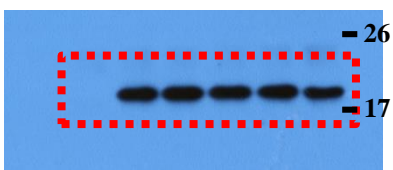

myc(Input)

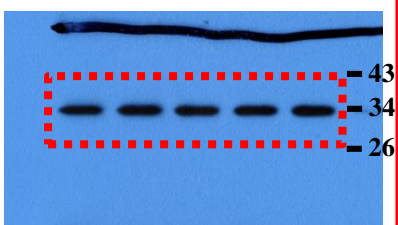

FUNDC1(Input)

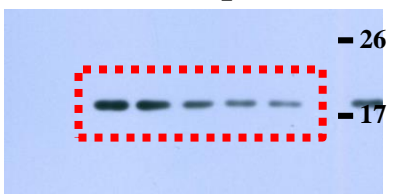

### Fig6B

myc(IP:flag)

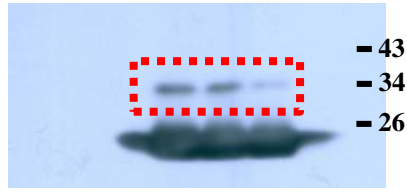

flag(IP:flag)

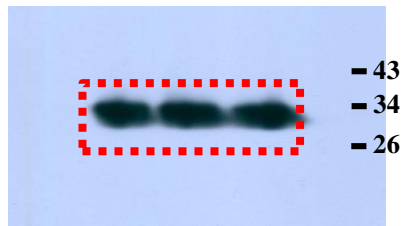

myc(Input)

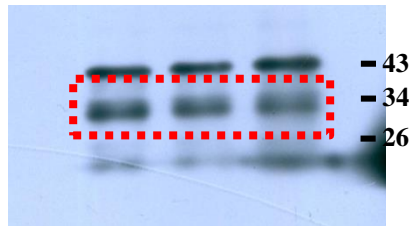

flag(Input)

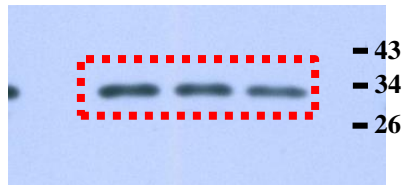

Actin(Input)

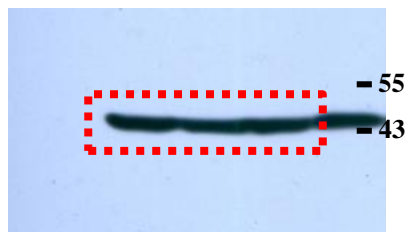

### Fig6C

myc(IP:GFP)

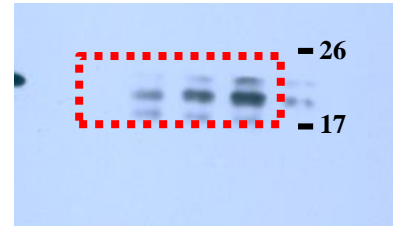

flag(IP:GFP)

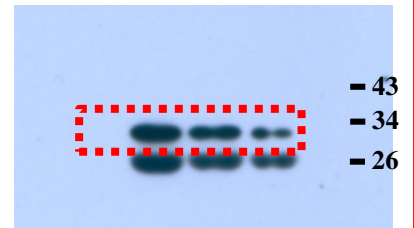

GFP(IP:GFP)

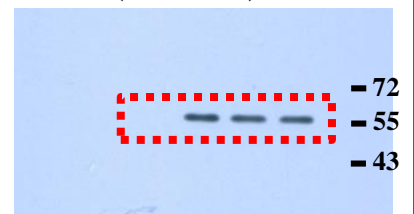

myc(Input)

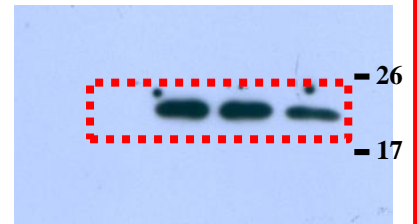

flag(Input)

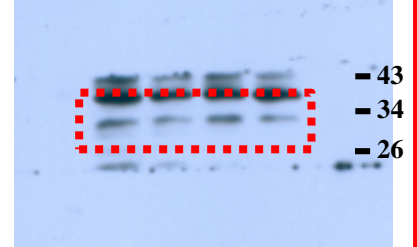

GFP(Input)

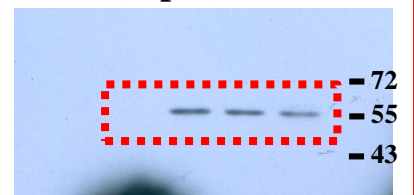

### Fig6D

myc(IP:flag)

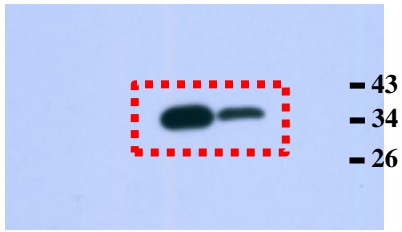

flag(IP:flag)

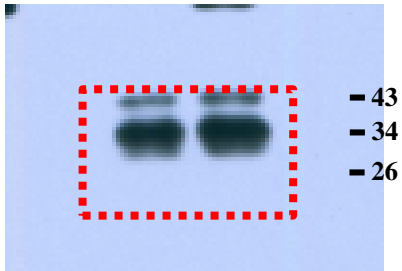

myc(Input)

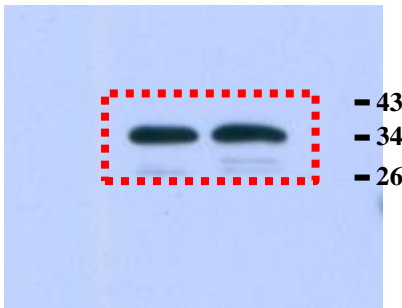

flag(Input)

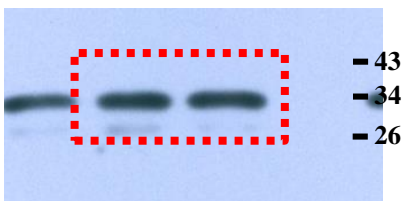

Actin(Input)

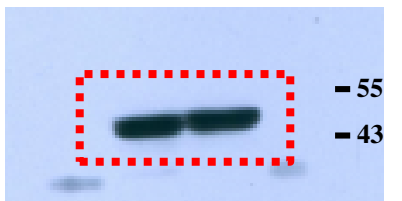

### Fig6E

myc(IP:FUNDC1)

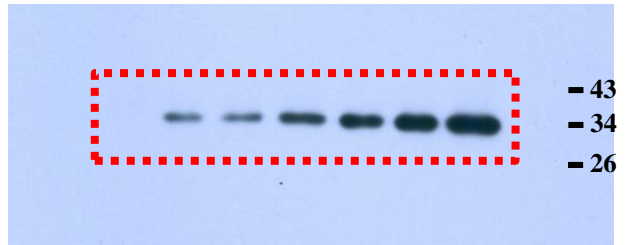

FUNDC1(IP:FUNDC1)

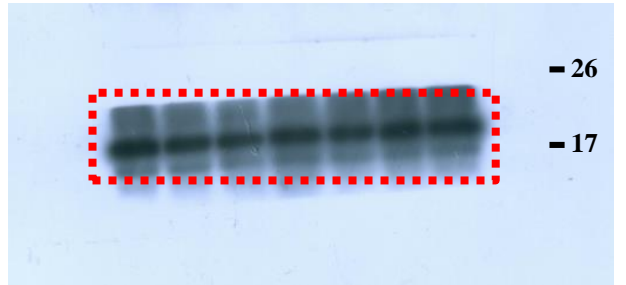

myc(Input)

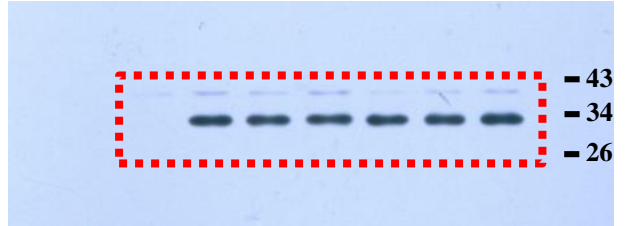

FUNDC1(Input)

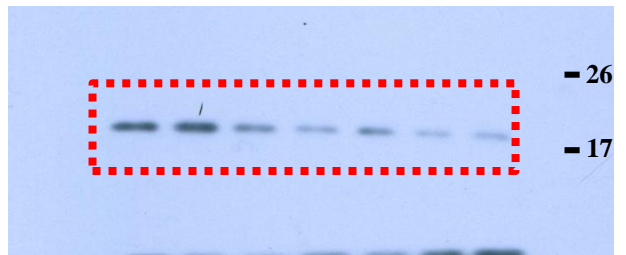

Actin(Input)

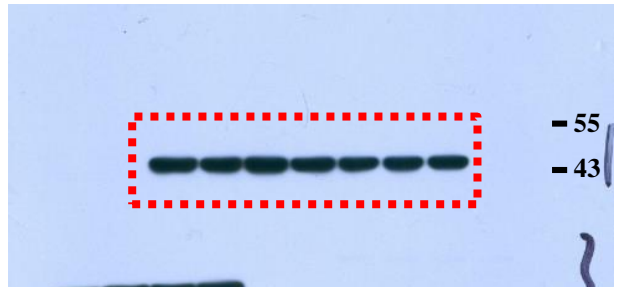

Supplement: EMBR-18-495-s008.pdf [file EMBR-18-495-s008.pdf]
