# Supplementary material
Source: PubMed Central journal article supplement (PMC5331199)

**Fig5C**

**FUNDC1**

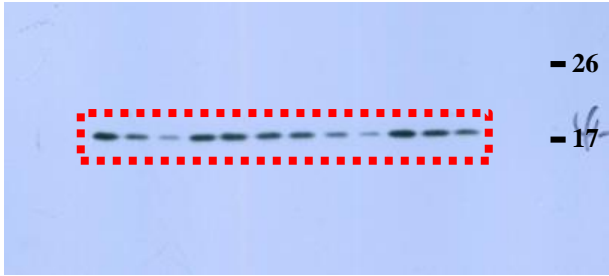

**Tim23**

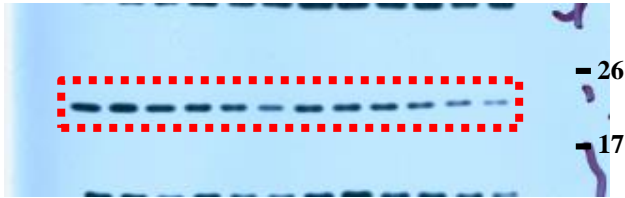

**Tom20**

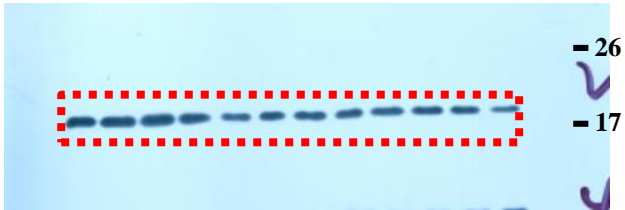

**MARCH5**

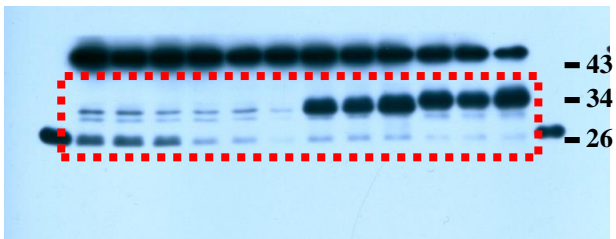

**Actin**

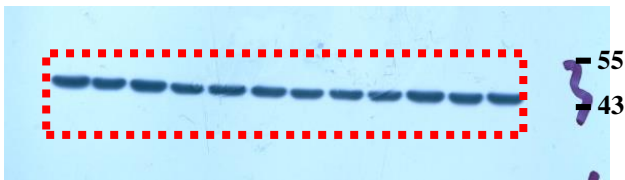

**Fig5D**

**FUNDC1**

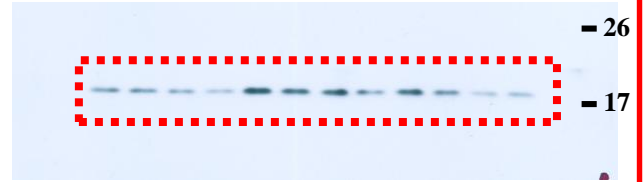

**Tim23**

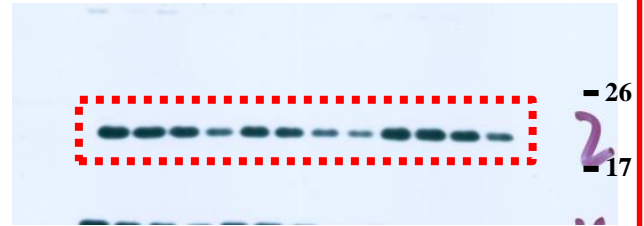

**Tom20**

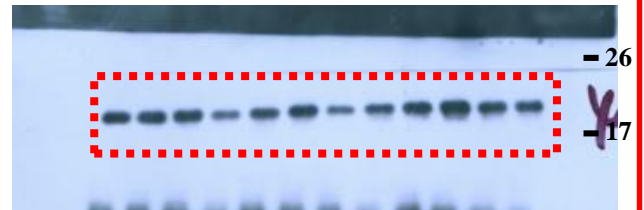

**MARCH5**

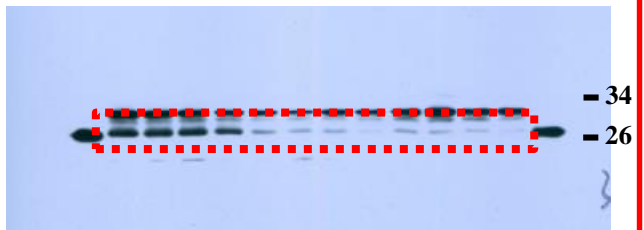

**Actin**

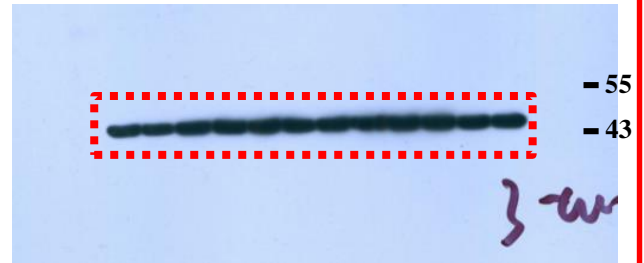

Supplement: EMBR-18-495-s007.pdf [file EMBR-18-495-s007.pdf]
